# Supplementary material for: Electrochemical reduction of nitrate to hydroxylamine on gold electrode
Source: Royal Society of Chemistry journal article supplement (doi:10.1039/d4cc03620d), 2024-01-01
Supplement: d4cc03620d1.pdf [file d4cc03620d1.pdf]

## Supporting Information

### Electrochemical Reduction of Nitrate to Hydroxylamine on Gold Electrode

Yangshan Xie,<sup>a</sup> Michiel De Ras,<sup>b</sup> Jiwu Zhao,<sup>c,d</sup> Tianxi Liu,<sup>e</sup> Feili Lai,<sup>e</sup> Johan Hofkens,<sup>b,f</sup> Maarten  
B.J. Roeffaers,<sup>\*a</sup>

<sup>a</sup>Centre for Membrane Separations, Adsorption, Catalysis, and Spectroscopy for Sustainable Solutions, Department of Microbial and Molecular Systems, KU Leuven Celestijnenlaan 200F, 3001 Leuven, Belgium.

<sup>b</sup>Molecular Imaging and Photonics, Department of Chemistry, KU Leuven, Celestijnenlaan 200F, Leuven, 3001, Belgium

<sup>c</sup>State Key Laboratory of Photocatalysis on Energy and Environment, College of Chemistry, Fuzhou University, Fuzhou, 350116 China

<sup>d</sup>Division of Physical Sciences and Engineering, King Abdullah University of Science and Technology (KAUST), Thuwal, 23955–6900 Saudi Arabia

<sup>e</sup>*The Key Laboratory of Synthetic and Biological Colloids, Ministry of Education, School of Chemical and Material Engineering, International Joint Research Laboratory for Nano Energy Composites, Jiangnan University, Wuxi, China*

<sup>f</sup>Max Plank Institute for Polymer Research, Mainz, D-55128, Germany.

\*Corresponding author: E-mail address: [maarten.roeffaers@kuleuven.be](mailto:maarten.roeffaers@kuleuven.be)

## Experimental Details

### 1. Chemicals

Chemicals: Gold wire (99.999%, 0.5mm diameter), absolute ethanol (C<sub>2</sub>H<sub>5</sub>OH), nitric acid (HNO<sub>3</sub>), sulfuric acid (H<sub>2</sub>SO<sub>4</sub>), hydroxylammonium chloride (NH<sub>2</sub>OH•HCl) and ammonia standard solution (1000 ppm), potassium nitrate (KNO<sub>3</sub>), potassium nitrite (KNO<sub>2</sub>), hydroxylamine solution (NH<sub>2</sub>OH, 50 wt. % in H<sub>2</sub>O), deionized water (18 MΩ) was used to prepare all aqueous solutions. Besides, all chemicals were analytical grade and obtained from commercial suppliers and used without further purification.

### 2. Electrochemical performance characterizations

The crystal structure of samples was determined by X-ray diffraction (XRD, D8 Advance X-ray diffractometer) operated at 40 kV and 40 mA with a Cu Kα radiation ( $\lambda=1.5405 \text{ \AA}$ ) in the  $2\theta$  ranging from 5° to 70° with a step size of 0.02°.

The morphology and structure of the samples were performed by a scanning electron microscopy (SEM) at an accelerating voltage of 10 kV. The system is equipped with an EDX detector (129 eV, 60 mm, Octane Silicon Drift Detector, EDAX, AMTEK Inc. USA).

The concentration of the leached Au<sup>3+</sup> in solution was quantified by an inductively coupled plasma mass spectrometry instrument.

### 3. Electrochemical nitrate reduction reaction (NO<sub>3</sub>RR) measurements

The electrochemical measurements were performed on an electrochemical workstation (Biological VSP-300) with 0.1 M HNO<sub>3</sub> as an electrolyte. Electrochemical analysis was carried out in a H-shape three-electrode quartz cell, among which the Au electrode, a titanium MMO anode mesh (1mm thick x 25mm x 25mm), and saturated calomel electrode (SCE) were employed as the working electrode, counter electrode, and reference electrode, respectively. Counter electrode (titanium MMO anode mesh) and working electrode (Au electrode) were placed in a separate cell separated by a Nafion 117 membrane. The length of gold wire was 5 cm. 0,1 M HNO<sub>3</sub> solution (80 mL) was evenly distributed to the cathode and anode compartment. All the potentials are expressed in reversible hydrogen electrode (RHE) scale using

$$E \text{ (vs. RHE)} = E \text{ (vs. SCE)} + 0.241 + 0.059 \times \text{pH}.$$

The potentiostatic tests were carried out in 0.1 M HNO<sub>3</sub> as the electrolyte at different given potentials for 1 h with a stirring rate of 500 rpm. Linear sweep voltammetry (LSV) experiments were carried out on an electrochemical workstation (Biological VSP-300). The cathodic polarization curves were obtained using the linear sweep voltammetry technique with a scan rate of 0.5 mV s<sup>-1</sup> in 0.1 M HNO<sub>3</sub> aqueous solution.

For the study of the influence of pH, a solution containing different concentration of H<sub>2</sub>SO<sub>4</sub> and 0.1 M KNO<sub>3</sub> was used at an applied potential of -0.7V vs RHE.

#### 4. Hydroxylamine (NH<sub>2</sub>OH) and ammonia (NH<sub>3</sub>) detection by using ion chromatography

Primary NH<sub>2</sub>OH and NH<sub>3</sub> detections and quantifications were carried out by using ion chromatography (Eco IC from Metrohm). NH<sub>2</sub>OH calibration curve was made by diluting NH<sub>2</sub>OH·HCl solution into six different concentrations of NH<sub>2</sub>OH (0.1 ppm, 0.2ppm, 0.5ppm, 1ppm, 2ppm and 5ppm). The fitting curve ( $A = 0.075C - 3.885 \times 10^{-4}$ ,  $R^2 = 0.99994$ ) was found to be in linear coherence with the concentration of NH<sub>2</sub>OH. Then NH<sub>2</sub>OH concentration was quantified by NH<sub>2</sub>OH calibration curve.

NH<sub>3</sub> calibration curve was made by diluting 1000 ppm ammonia standard solution into six different concentrations of NH<sub>3</sub> (0.2ppm, 0.5ppm, 1ppm, 2ppm 5ppm and 10ppm). The fitting curve ( $A = 0.229C - 2.702 \times 10^{-4}$ ,  $R^2 = 0.99999$ ) was found to be in linear coherence with the concentration of NH<sub>3</sub>. NH<sub>3</sub> concentration was quantified by NH<sub>3</sub> calibration curve.

For nitrate electroreduction, the yield and Faradaic efficiency were calculated by the following equations:

NH<sub>2</sub>OH yield rate calculation :

$$\text{Yield}_{\text{NH}_2\text{OH}} = (c_{\text{NH}_2\text{OH}} \times V) / (M_{\text{NH}_2\text{OH}} \times t \times S)$$

Calculation of Faradic efficiency (FE) towards NH<sub>2</sub>OH

$$\text{Faradaic efficiency} = (6F \times c_{\text{NH}_2\text{OH}} \times V) / (M_{\text{NH}_2\text{OH}} \times Q)$$

NH<sub>3</sub> yield rate calculation:

$$\text{Yield}_{\text{NH}_3} = (c_{\text{NH}_3} \times V) / (M_{\text{NH}_3} \times t \times S)$$

Calculation of Faradic efficiency (FE) towards NH<sub>3</sub>

$$\text{Faradaic efficiency} = (8F \times c_{\text{NH}_3} \times V) / (M_{\text{NH}_3} \times Q)$$

where  $c_{\text{NH}_2\text{OH}}$  and  $c_{\text{NH}_3}$  are the mass concentration of NH<sub>2</sub>OH and NH<sub>3</sub> respectively, V is the volume of electrolyte in the cathode compartment,  $M_{\text{NH}_2\text{OH}}$  and  $M_{\text{NH}_3}$  are the molar mass of NH<sub>2</sub>OH and NH<sub>3</sub> respectively, t is the electrolysis time, S is the geometric area of working electrode, F is the Faradaic constant, Q is the total charge passing the electrode.

#### 5. Ammonia (NH<sub>3</sub>) detection by using the indophenol blue method

The concentration of produced NH<sub>3</sub> in the electrolyte was spectrophotometrically determined by the indophenol blue method. In detail, 2 mL of 1 M NaOH solution containing salicylic acid (5 wt.%) and sodium citrate (5 wt.%) was added in 2 mL diluted electrolyte. Subsequently, 1 mL of NaClO solution (0.05 M) and 0.2 mL of sodium nitroferricyanide solution (1 wt.%) were added to the above solution. Absorbance measurements were performed from 500 nm to 800 nm. The concentration-absorbance (at 655 nm) curve was calibrated using standard NH<sub>4</sub><sup>+</sup> solutions with a series of concentrations. The fitting curve ( $A = 0.1482C + 0.0306$ ,  $R^2 = 0.9952$ ) showed a good linear relationship between absorbance value and NH<sub>3</sub> concentration.

#### 6. Hydrogen (H<sub>2</sub>) detection by using gas chromatography

Calibration curves for H<sub>2</sub> were established, which were then used to determine the production rates and FE of H<sub>2</sub> in NO<sub>3</sub>RR. Various volumes of H<sub>2</sub> were injected directly in the GC (Shimadzu 2014 GC, molecular sieve 5A column, TCD detector) to generate the H<sub>2</sub> calibration curve. The fitting curve ( $A = 214829V + 2406$ ,  $R^2 = 0.9984$ ) demonstrated a strong linear relationship between the peak area and H<sub>2</sub> volume. The electrocatalytic reactions were conducted at -0.7 V vs. RHE in 0.1 M HNO<sub>3</sub> for 1 h, and 1mL of reactive gas was sampled from the reactor with a syringe for analysis using a gas chromatograph.

The yield and Faradaic efficiency of H<sub>2</sub> were calculated by the following equations:

H<sub>2</sub> yield rate calculation :

$$\text{Yield}_{\text{H}_2} = V_{\text{H}_2} / (V_m \times t \times S)$$

Calculation of Faradic efficiency (FE) towards H<sub>2</sub>:

$$\text{Faradaic efficiency} = n Z F / I t$$

where  $V_{\text{H}_2}$  is the  $\text{H}_2$  volume,  $V_m$  is the molar volume of gas,  $n$  is the number of moles of  $\text{H}_2$  evolution,  $Z$  is the needed electrons to produce one  $\text{H}_2$  molecule,  $t$  is the electrolysis time,  $S$  is the geometric area of working electrode,  $F$  is the Faradaic constant,  $t$  is the time,  $I$  is the defined current density.

## 7. Control experiments

A solution of 250 ppm  $\text{NH}_2\text{OH}$  was prepared in 100 mL of 0.1 M  $\text{HNO}_3$ . Afterward, 5 mM  $\text{KNO}_2$  was added to the solution every 30 minutes. Samples were collected every 10 minutes for subsequent ion chromatography analysis.

## 8. Calculation methods

The density function theory (DFT) calculations were performed on Vienna *Ab initio* Simulation Package (VASP) code<sup>1, 2</sup>. The interaction of core and electrons was treated by projector augmented wave (PAW) pseudopotential<sup>3, 4</sup> with a cut-off energy of 500 eV. The exchange-correlation function was described by the generalized-gradient approximation-Perdew-Burke-Ernzerhof (GGA-PBE)<sup>5</sup>. The DFT-D3 (BJ) method was used to consider the vdW-dispersion energy-correction<sup>6</sup>. Convergence in geometry optimization was reached when the force on each atom fell below  $0.02 \text{ eV } \text{\AA}^{-1}$ . The Au with exposed (111) facet was modeled as electrocatalyst surfaces to simulate  $\text{NO}_3^-$  reduction reaction. A vacuum layer of  $18 \text{ \AA}$  was introduced to eliminate the interaction between two adjacent slabs. The Brillouin zone sampling was performed using Gamma-centered Monkhorst-Pack (MP) grids<sup>7</sup>, and the k-point was set as  $3 \times 3 \times 1$  for all the DFT calculations. The data processing was assisted by VASPKIT<sup>8</sup>, QVASP<sup>9</sup> and VESTA<sup>10</sup> software. The Gibbs free energy difference ( $\Delta G$ ) between initial and final states was denoted as:

$$\Delta G = \Delta E + \Delta \text{ZPE} - T\Delta S$$

where  $E$ ,  $\text{ZPE}$ ,  $T$  and  $S$  represent the energy from DFT calculation, zero-point energy, temperature (298.15 K) and entropy, respectively<sup>11, 12</sup>.

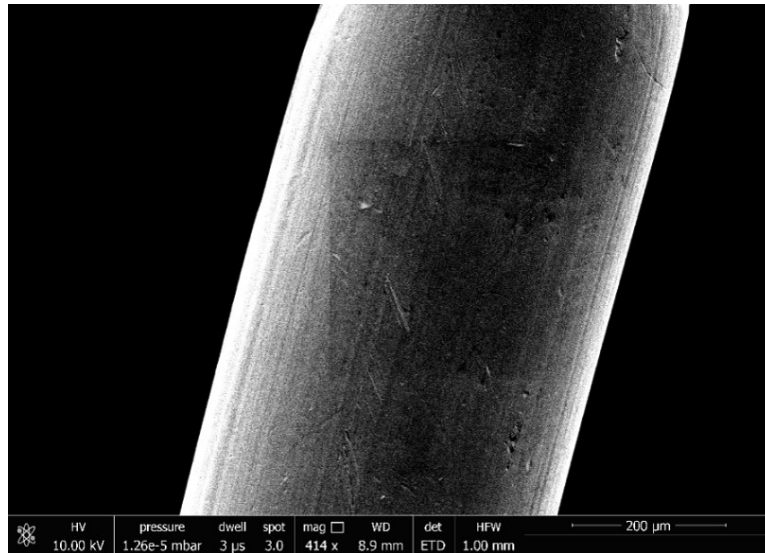

Fig. S1. SEM image of Au wire.

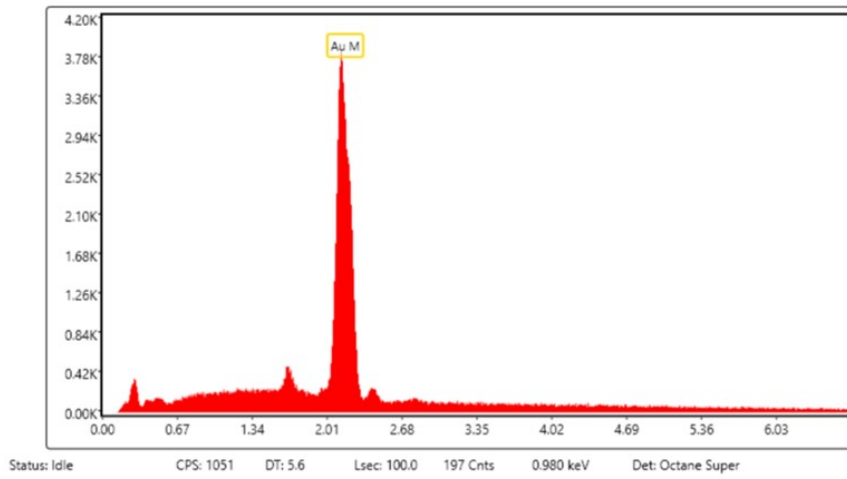

Fig. S2. EDX of Au wire.

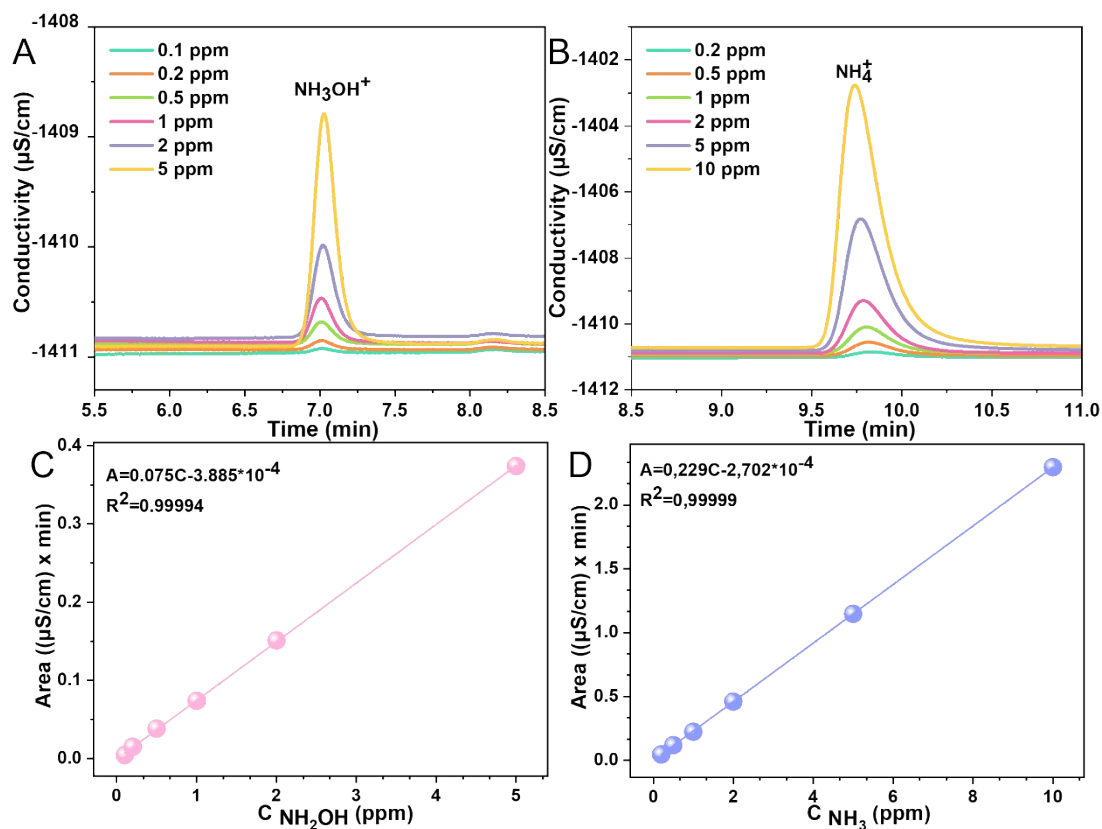

Fig. S3. Ion chromatographic analysis of  $\text{NH}_3\text{OH}^+$  (A) and  $\text{NH}_4^+$  (B) at different  $\text{NH}_2\text{OH}$  and  $\text{NH}_3$  concentration; the corresponding  $\text{NH}_2\text{OH}$  (C) and  $\text{NH}_3$  (D) calibration curves.

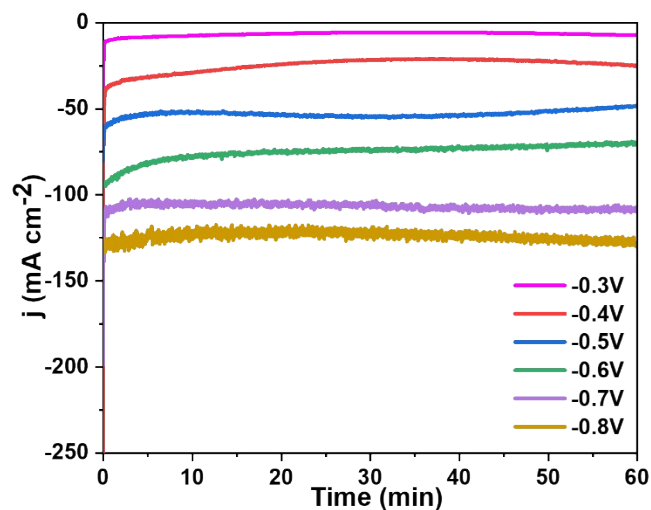

Fig. S4. Chronoamperometry curves of Au wire in 0.1 M  $\text{HNO}_3$  at applied potentials for 1 hour.

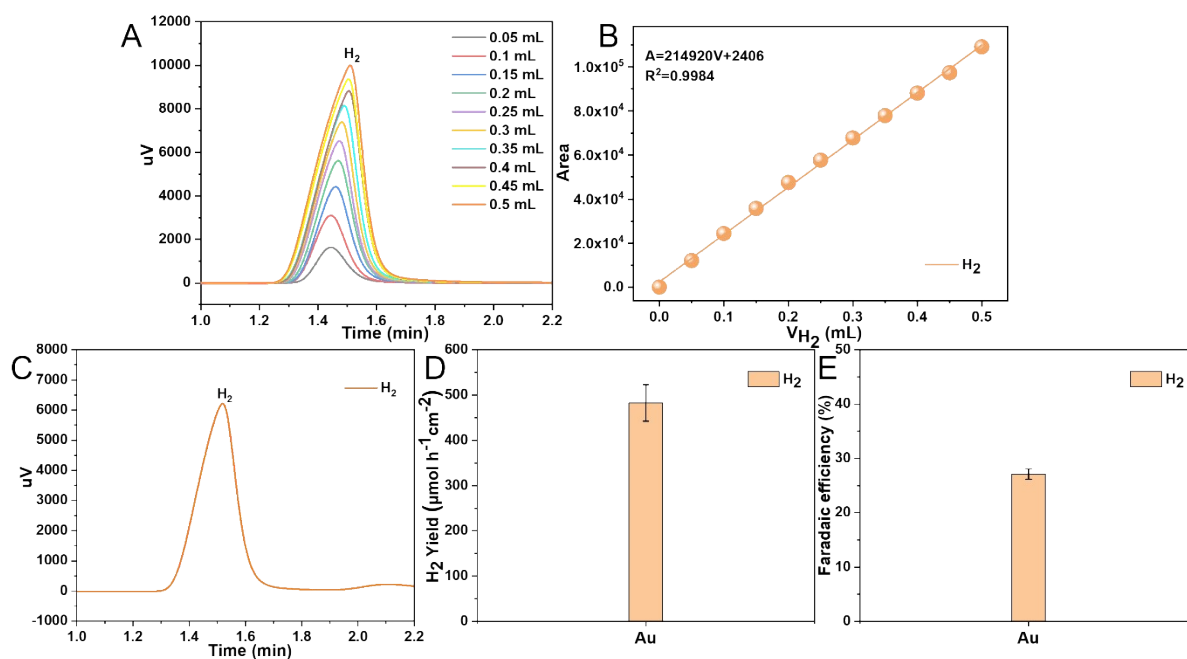

Fig. S5. (A) GC data for generating the calibration curve generated by injecting different H<sub>2</sub> volume; (B) the corresponding H<sub>2</sub> calibration curve; (C) GC curves, (D) H<sub>2</sub> yield and (E) H<sub>2</sub> Faradaic efficiency of Au electrode at an applied potential of -0.7 V vs. RHE in 0.1 M HNO<sub>3</sub> for a period of 1 hour.

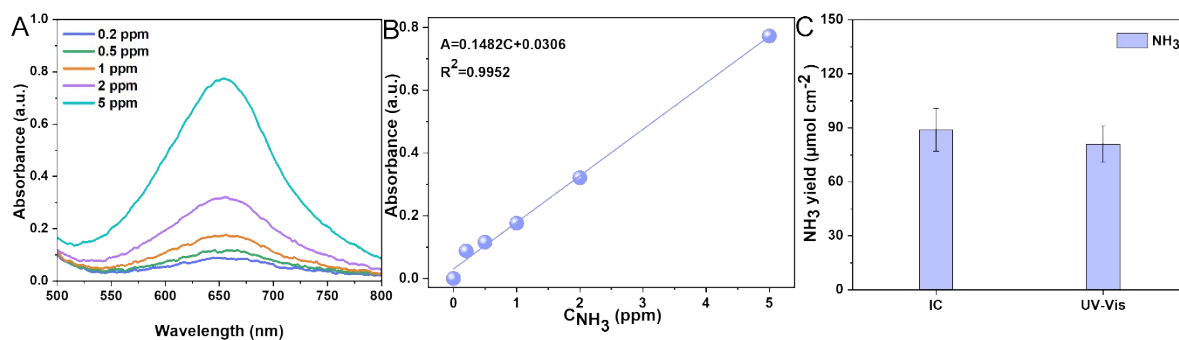

Fig. S6. (A) UV-Vis absorption curves of indophenol assays with ammonia; (B) the corresponding ammonia concentration-absorbance calibration curve; (C) the NH<sub>3</sub> yield rate of Au electrode at -0.7 V vs. RHE quantified by IC and UV-Vis methods for comparative analysis.



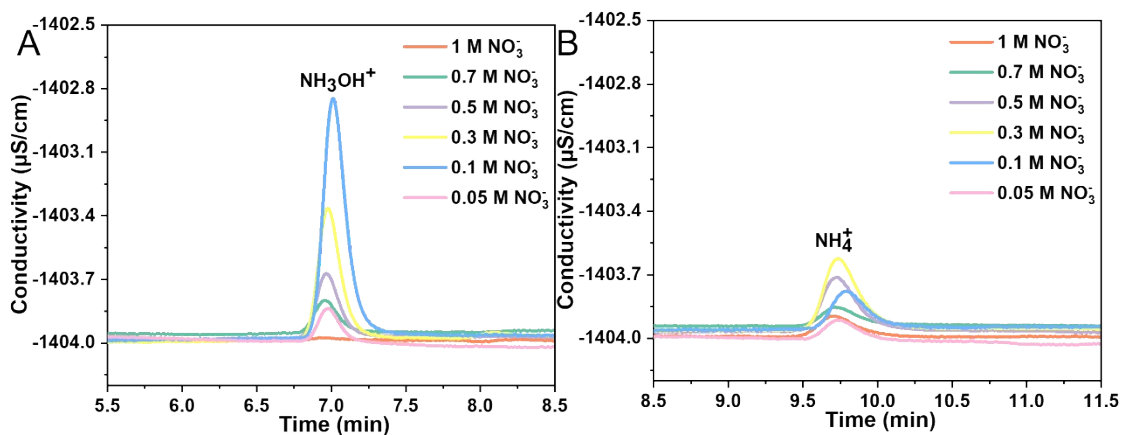

Fig. S7. Ion chromatographic analysis of  $\text{NH}_3\text{OH}^+$  (A) and  $\text{NH}_4^+$  (B) at different nitrate concentrations at pH 1; performance assessed at an applied potential of  $-0.7$  V vs. RHE over a 1-hour reaction time.

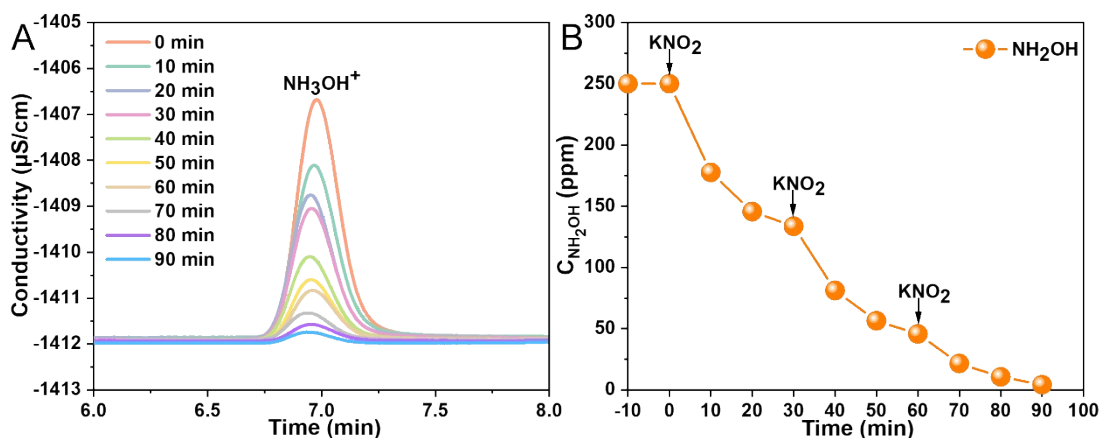

Fig. S8. (A) Ion chromatographic analysis of a  $0.1$  M  $\text{HNO}_3$  solutions containing  $250$  ppm  $\text{NH}_2\text{OH}$  at different time after the addition of  $\text{KNO}_2$ ; (B)  $\text{NH}_2\text{OH}$  concentration over time in  $0.1$  M  $\text{HNO}_3$  solutions after adding  $\text{KNO}_2$ .

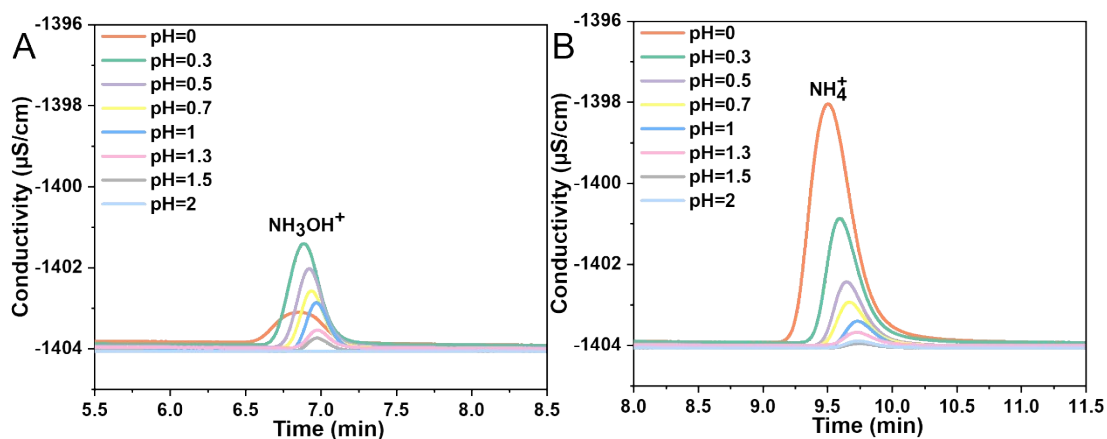

Fig. S9. Ion chromatographic analysis of  $\text{NH}_3\text{OH}^+$  (A) and  $\text{NH}_4^+$  (B) across various pH levels, assessed in a solution of 0.1 M  $\text{KNO}_3$  with  $\text{H}_2\text{SO}_4$  adjusting the pH, at an applied potential of -0.7 V vs. RHE for a period of 1 hour.

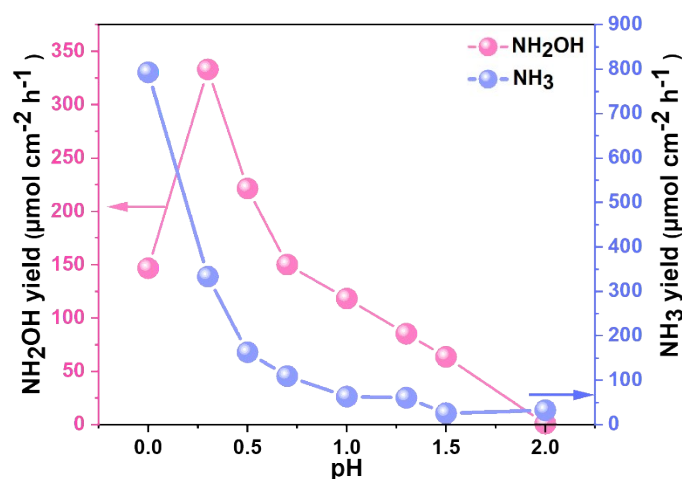

Fig. S10. Yield rates of  $\text{NH}_2\text{OH}$  and  $\text{NH}_3$  across various pH levels, assessed in a solution of 0.1 M  $\text{KNO}_3$  with  $\text{H}_2\text{SO}_4$  adjusting the pH, at an applied potential of -0.7 V vs RHE for a period of 1 hour.

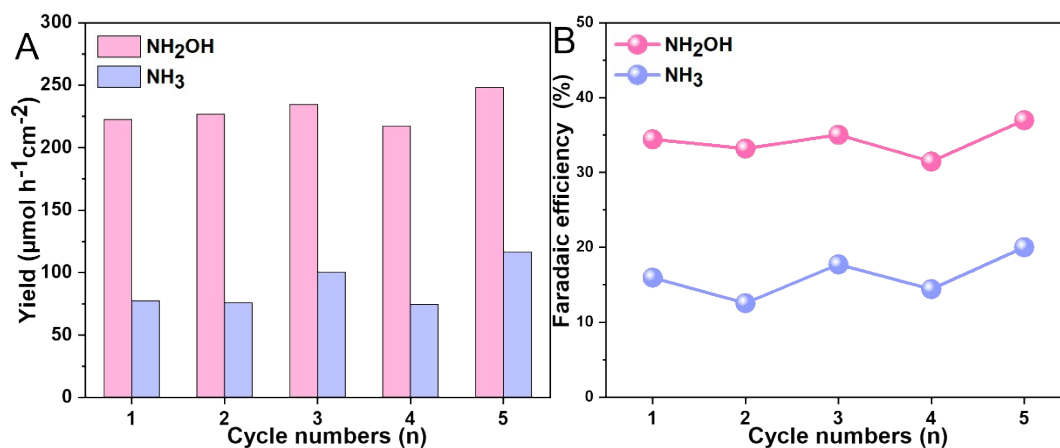

Fig. S11. Stability test results for the Au electrode.  $\text{NH}_2\text{OH}$  and  $\text{NH}_3$  yield rate (A) and Faradaic efficiency (B) of Au electrode at  $-0.7 \text{ V}$  vs. RHE in  $0.1 \text{ M HNO}_3$  in different cycles.

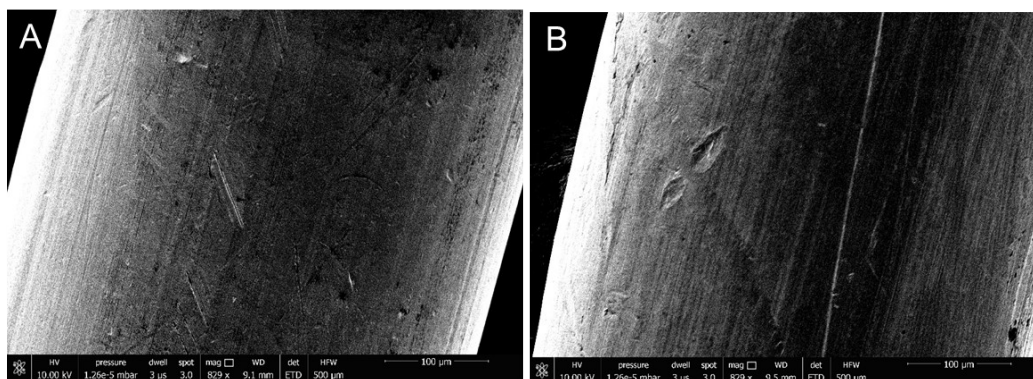

Fig. S12. SEM images of Au wire before (A) and after (B) test.

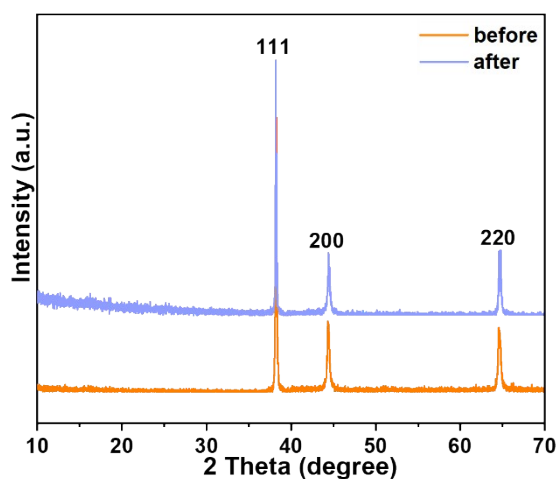

Fig. S13. XRD pattern of Au wire before and after test.

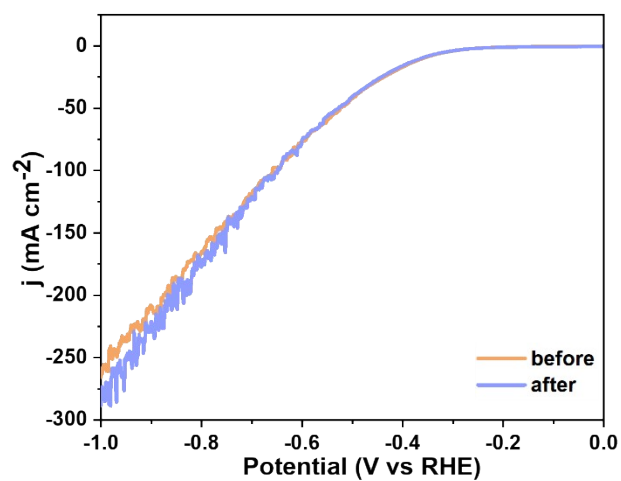

Fig. S14. LSV curves of Au wire before and after test.

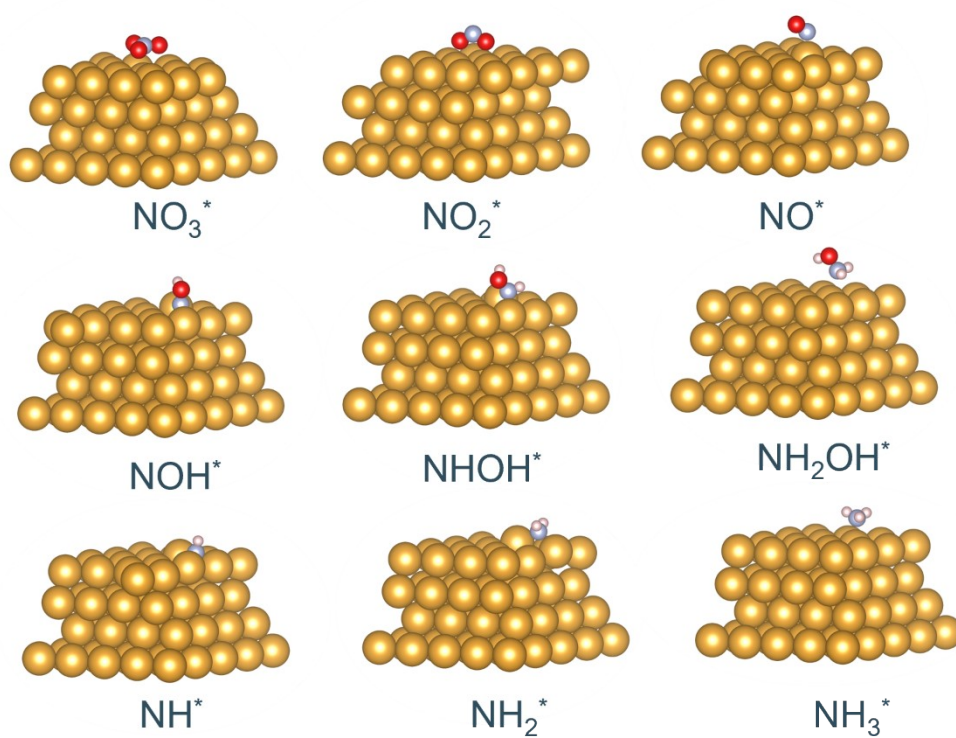

Fig. S15. The reaction intermediate adsorption configurations of  $\text{NO}_3\text{RR}$  to  $\text{NH}_2\text{OH}$  and  $\text{NH}_3$  on the Au surface. The red, pink, gray and yellow balls represent oxygen, hydrogen, nitrogen and gold atoms, respectively.

Table S1. The measured pH of electrolytes before and after reaction under different nitrate concentration in 0.1 M HNO<sub>3</sub> at -0.7 V vs. RHE for 2 hour

| Concentration of Nitrate | pH     |       |         |
|--------------------------|--------|-------|---------|
|                          | before | After | Changed |
| 0.1 M                    | 1.19   | 1.30  | 0.11    |
| 0.3 M                    | 1.28   | 1.73  | 0.45    |
| 0.5 M                    | 1.28   | 1.96  | 0.68    |
| 0.7 M                    | 1.27   | 2.20  | 0.93    |
| 1 M                      | 1.25   | 2.74  | 1.49    |

Table S2. The ICP analysis of leakage Au<sup>3+</sup> before and after test

| Samples     | Leakage   |                         |
|-------------|-----------|-------------------------|
|             | Condition | Au <sup>3+</sup> (mg/L) |
| Electrolyte | before    | N.D.                    |
| Au wire     | after     | N.D.                    |

**Note:** N.D. = Not Detected.

Table S3. Free energy of various intermediates on Au, setting the first adsorbed state as the reference level.

| Reactant/Intermediates   | Energy (eV) |
|--------------------------|-------------|
| $\text{NO}_3^-$          | 0.00        |
| $\text{NO}_3^*$          | -0.75       |
| $\text{NO}_2^*$          | -2.91       |
| $\text{NO}^*$            | -3.50       |
| $\text{NOH}^*$           | -3.15       |
| $\text{NHOH}^*$          | -3.97       |
| $\text{NH}_2\text{OH}^*$ | -4.90       |
| $\text{NH}_2\text{OH}$   | -6.60       |
| $\text{NH}^*$            | -4.46       |
| $\text{NH}_2^*$          | -6,23       |
| $\text{NH}_3^*$          | -7.34       |
| $\text{NH}_3$            | -7.98       |

Table S4. Comparison of the rate-determining step (RDS) of Au wire with other reported electrocatalysts for NO<sub>3</sub>RR.

| Catalysts                         | RDS        | Energy  | Reference |
|-----------------------------------|------------|---------|-----------|
| Au                                | NO* → NOH* | 0.35 eV | This work |
| Cu/Cu <sub>2</sub> O              | NO* → NOH* | 0.84 eV | 13        |
| PdCu                              | NO* → NOH* | 0.53 eV | 14        |
| PdCo                              |            | 0.64 eV |           |
| PdFe                              |            | 0.75 eV |           |
| PdNi                              |            | 0.89 eV |           |
| Pd                                |            | 0.92 eV |           |
| FePc                              | NO* → NOH* | 0.85 eV | 15        |
| FePc/TiO <sub>2</sub>             |            | 0.74 eV |           |
| Ni                                | NO* → NOH* | 0.37 eV | 16        |
| Rh                                |            | 0.39 eV |           |
| Pd                                |            | 0.72 eV |           |
| Fcc Pd (100)                      | NO* → NOH* | 0.45 eV | 17        |
| Fe <sub>3</sub> C                 | NO* → NOH* | 1.74 eV | 18        |
| Fe <sub>3</sub> C-Cu <sub>3</sub> |            | 1.28 eV |           |

## References

1. G. Kresse and J. Furthmüller, *Comput. Phys. Commun.*, 1996, **6**, 15-50.
2. G. Kresse and J. Furthmüller, *Phys. Rev. B*, 1996, **54**, 11169-11186.
3. G. Kresse and D. Joubert, *Phys. Rev. B*, 1999, **59**, 1758-1775.
4. P. E. Blöchl, *Phys. Rev. B*, 1994, **50**, 17953-17979.
5. J. P. Perdew, K. Burke and M. Ernzerhof, *Phys. Rev. Lett.*, 1996, **77**, 3865-3868.
6. S. Grimme, S. Ehrlich and L. Goerigk, *J. Comput. Chem.*, 2011, **32**, 1456-1465.
7. D. J. Chadi and M. L. Cohen, *Phys. Rev. B*, 1973, **8**, 5747-5753.
8. V. Wang, N. Xu, J.-C. Liu, G. Tang and W.-T. Geng, *Comput. Phys. Commun.*, 2021, **267**, 108033.
9. W. Yi, G. Tang, X. Chen, B. Yang and X. Liu, *Comput. Phys. Commun.*, 2020, **257**, 107535.
10. K. Momma and F. Izumi, *J. Appl. Crystallogr.*, 2011, **44**, 1272-1276.
11. J. K. Nørskov, J. Rossmeisl, A. Logadottir, L. Lindqvist, J. R. Kitchin, T. Bligaard and H. Jónsson, *J. Phys. Chem. B*, 2004, **108**, 17886-17892.
12. J. Zhang, J. Ma, T. S. Choksi, D. Zhou, S. Han, Y.-F. Liao, H. B. Yang, D. Liu, Z. Zeng, W. Liu, X. Sun, T. Zhang and B. Liu, *J. Am. Chem. Soc.*, 2022, **144**, 2255-2263.
13. N. Zhou, Z. Wang, N. Zhang, D. Bao, H. Zhong and X. Zhang, *ACS Catal.*, 2023, **13**, 7529-7537.
14. Y. Zhou, L. Zhang, Z. Zhu, M. Wang, N. Li, T. Qian, C. Yan and J. Lu, *Angew. Chem. Int. Ed. Engl.*, 2024, **63**, e202319029.
15. R. Zhang, C. Li, H. Cui, Y. Wang, S. Zhang, P. Li, Y. Hou, Y. Guo, G. Liang, Z. Huang, C. Peng and C. Zhi, *Nat Commun*, 2023, **14**, 8036.
16. M. Karamad, T. J. Goncalves, S. Jimenez-Villegas, I. D. Gates and S. Siahrostami, *Faraday Discuss.*, 2023, **243**, 502-519.
17. M. Xie, S. Tang, Z. Li, M. Wang, Z. Jin, P. Li, X. Zhan, H. Zhou and G. Yu, *J. Am. Chem. Soc.*, 2023, **145**, 13957-13967.
18. Y. Hua, N. Song, Z. Wu, Y. Lan, H. Luo, Q. Song and J. Yang, *Adv. Funct. Mater.*, 2024, **34**.
